# Supplementary material for: Therapeutic Effects of Astragaloside IV on Myocardial Injuries: Multi-Target Identification and Network Analysis
Source: PubMed Central journal article supplement (PMC3444501; doi:10.1371/journal.pone.0044938), 2012-09-17
Supplement: pone.0044938.s005.pdf [file pone.0044938.s005.pdf]

| Pathway Class Level I               | Pathway Class Level II               | Pathway Name                                               | Pathway ID                 | Enrichment Type |
|-------------------------------------|--------------------------------------|------------------------------------------------------------|----------------------------|-----------------|
| Cellular Processes                  | Cell Communication                   | Gap junction                                               | hsa04540                   | II              |
|                                     | Endocrine System                     | PPAR signaling pathway                                     | hsa03320                   | III             |
|                                     |                                      | Adipocytokine signaling pathway                            | hsa04920                   | I,III           |
|                                     |                                      | GnRH signaling pathway                                     | hsa04912                   | I,III           |
|                                     |                                      | Melanogenesis                                              | hsa04916                   | III             |
|                                     |                                      | Renin-angiotensin system                                   | hsa04614                   | I,II,III        |
|                                     | Immune System                        | Complement and coagulation cascades                        | hsa04610                   | I               |
|                                     |                                      | Leukocyte transendothelial migration                       | hsa04670                   | II,III          |
|                                     |                                      | T cell receptor signaling pathway                          | hsa04660                   | I               |
|                                     |                                      | Toll-like receptor signaling pathway                       | hsa04620                   | I               |
|                                     | Nervous System                       | Long-term depression                                       | hsa04730                   | III             |
|                                     | Sensory System                       | Taste transduction                                         | hsa04742                   | I,III           |
|                                     | Environmental Information Processing | Membrane Transport                                         | ABC transporters - General | hsa02010        |
| Signal Transduction                 |                                      | Calcium signaling pathway                                  | hsa04020                   | I,II            |
|                                     |                                      | MAPK signaling pathway                                     | hsa04010                   | I,III           |
|                                     |                                      | Phosphatidylinositol signaling system                      | hsa04070                   | III             |
|                                     |                                      | VEGF signaling pathway                                     | hsa04370                   | I               |
| Signaling Molecules and Interaction |                                      | Cell adhesion molecules (CAMs)                             | hsa04514                   | III             |
|                                     |                                      | Neuroactive ligand-receptor interaction                    | hsa04080                   | I               |
| Human Diseases                      | Cancers                              | Bladder cancer                                             | hsa05219                   | I               |
|                                     |                                      | Glioma                                                     | hsa05214                   | I               |
|                                     |                                      | Melanoma                                                   | hsa05218                   | I               |
|                                     |                                      | Pancreatic cancer                                          | hsa05212                   | I,II,III        |
|                                     |                                      | Renal cell carcinoma                                       | hsa05211                   | III             |
|                                     | Infectious Diseases                  | Cholera - Infection                                        | hsa05110                   | III             |
|                                     |                                      | Epithelial cell signaling in Helicobacter pylori infection | hsa05120                   | I               |
|                                     | Metabolic Disorders                  | Type II diabetes mellitus                                  | hsa04930                   | I               |
|                                     | Neurodegenerative Diseases           | Huntington's disease                                       | hsa05040                   | I               |
| Metabolism                          | Amino Acid Metabolism                | Arginine and proline metabolism                            | hsa00330                   | III             |

|  |                                                 |                                                 |          |     |
|--|-------------------------------------------------|-------------------------------------------------|----------|-----|
|  | Energy Metabolism                               | Nitrogen metabolism                             | hsa00910 | III |
|  | Lipid Metabolism                                | Biosynthesis of steroids                        | hsa00100 | III |
|  | Xenobiotics<br>Biodegradation and<br>Metabolism | Drug metabolism -<br>cytochrome P450            | hsa00982 | II  |
|  |                                                 | Metabolism of xenobiotics<br>by cytochrome P450 | hsa00980 | II  |
