# Supplementary material for: Therapeutic Effects of Astragaloside IV on Myocardial Injuries: Multi-Target Identification and Network Analysis
Source: PubMed Central journal article supplement (PMC3444501; doi:10.1371/journal.pone.0044938), 2012-09-17
Supplement: pone.0044938.s006.pdf [file pone.0044938.s006.pdf]

| Item | Gene ID         | Protein Definition                 | PDB ID                       | Target Class | Gene Ontology (GO)                                                                                  | Properties and implications for the therapy of cardiovascular diseases                                                                                                                                                                                                                                                                                                                                   |
|------|-----------------|------------------------------------|------------------------------|--------------|-----------------------------------------------------------------------------------------------------|----------------------------------------------------------------------------------------------------------------------------------------------------------------------------------------------------------------------------------------------------------------------------------------------------------------------------------------------------------------------------------------------------------|
| 1    | <b>ACE</b>      | Angiotensin-converting enzyme      | 1o86<br>1uze<br>2c6f<br>2iul | AC           | Regulation of vasoconstriction<br>Regulation of vasodilation                                        | ACE inhibitors are widely used in the treatment of cardiovascular diseases, including congestive heart failure, coronary artery disease and hypertension[1].                                                                                                                                                                                                                                             |
| 2    | <b>CALM1</b>    | Calmodulin                         | 1lvc                         | AC           | Response to calcium ion                                                                             | Calmodulin mediates the control of a large number of enzymes and other proteins by calcium ions which are key intracellular messengers in the cardiovascular system[1].                                                                                                                                                                                                                                  |
| 3    | <b>CYP3A4</b>   | Cytochrome P450 3A4                | 2v0m                         | AC           | Oxidation reduction                                                                                 | CYP3A4 is a member of cytochrome P450 family, which is involved in the biotransformation of a diverse range of xenobiotics, including therapeutic drugs and toxins. CYP3A4 in the liver metabolizes over 50% of drugs [2].                                                                                                                                                                               |
| 4    | <b>F2</b>       | Prothrombin                        | 1awh<br>2b5t                 | AC           | Positive regulation of blood coagulation                                                            | Drug target of anticoagulants. Involved in blood clotting cascade [1].                                                                                                                                                                                                                                                                                                                                   |
| 5    | <b>NOS3</b>     | Nitric oxide synthase, endothelial | 1m9k<br>3nos                 | AC           | Positive regulation of vasodilation<br>Regulation of systemic arterial blood pressure by endothelin | <i>In vivo</i> models of myocardial infarction suggest that NOS3 overexpression can limit compensatory hypertrophy in the remote myocardium and preserve left ventricular performance. The development of therapeutic strategies designed to enhance NO signaling in cardiac myocytes may target maladaptive left ventricular remodeling and improve functional recovery after myocardial infarction[3]. |
| 6    | <b>SERPINC1</b> | Antithrombin-III                   | 2b5t                         | AC           | Blood coagulation                                                                                   | Drug target of anticoagulants. Involved in blood coagulation cascade [1].                                                                                                                                                                                                                                                                                                                                |
| 7    | <b>EGFR</b>     | Epidermal growth factor receptor   | 1ivo                         | AC           | Positive regulation of MAP kinase activity                                                          | Activation of the EGFR causes activation of PI3K and JNK pathways, which play fundamental roles in the regulation of myocardial contractility and hypertrophy. Blockade of the EGFR attenuates Ang II-mediated cardiac hypertrophy[4].                                                                                                                                                                   |
|      |                 |                                    | 1mox                         |              |                                                                                                     |                                                                                                                                                                                                                                                                                                                                                                                                          |
| 8    | <b>EGF</b>      | Pro-epidermal growth factor        | 1ivo                         | A            | Positive regulation of EGFR activity                                                                | EGF positively regulates epidermal growth factor receptor (EGFR) activity and activates MAPK activity. Inhibition of EGFR or MAPK has beneficial effects for cardiovascular                                                                                                                                                                                                                              |

|    |                 |                                                            |              |   |                                                                  |                                                                                                                                                                                                                                                                               |
|----|-----------------|------------------------------------------------------------|--------------|---|------------------------------------------------------------------|-------------------------------------------------------------------------------------------------------------------------------------------------------------------------------------------------------------------------------------------------------------------------------|
|    |                 |                                                            |              |   | Activation of MAPK activity                                      | diseases[4,5].                                                                                                                                                                                                                                                                |
| 9  | ADH5            | Alcohol dehydrogenase class-3                              | 1teh         | A | Oxidation reduction<br>Response to redox state                   | ADH5 catalyzes the oxidation of long-chain primary alcohols and the oxidation of S-(hydroxymethyl) glutathione.                                                                                                                                                               |
| 10 | AKR1C4          | Aldo-keto reductase family 1 member C4                     | 2fv1         | A | Oxidation reduction                                              | Catalyzes the transformation of the potent androgen dihydrotestosterone (DHT) into the less active form.                                                                                                                                                                      |
| 11 | CN              | Calcineurin                                                | 1m63<br>1mf8 | A | Calcium ion binding<br>Calmodulin binding                        | Inhibition of calcineurin has proved to be effective for the treatment of cardiac hypertrophy[6].                                                                                                                                                                             |
| 12 | <b>FGFR1</b>    | Basic fibroblast growth factor receptor 1                  | 1agw         | A | MAPKKK cascade                                                   | Fibroblast growth factor 2 (FGF2) plays an important role in inducing cardiac hypertrophy. Many of the effects of FGF-2 are mediated by binding and activating FGFR. The FGF2-FGFR1 axis needs to be considered as a potential target for the management of hypertrophy[7].   |
| 13 | GAPDH           | Glyceraldehyde-3-phosphate dehydrogenase                   | 1u8f         | A | Oxidation reduction                                              | Independent of its glycolytic activity, it is also involved in membrane trafficking in the early secretory pathway.                                                                                                                                                           |
| 14 | <b>HLA-DRB1</b> | HLA class II histocompatibility antigen, DRB1-1 beta chain | 1bx2         | A | Immune response                                                  | Human leukocyte antigens (HLA) are the designation for antigens in the major histocompatibility complex (MHC), a major determinant of the immune response. It is considered to play a significant role in the pathophysiology of atherosclerosis[8].                          |
| 15 | <b>INSR</b>     | Insulin receptor                                           | 1ir3<br>2hr7 | A | Activation of MAPK activity                                      | INSR binds insulin and mediates metabolic functions of insulin. Can activate PI3K either directly by binding to the p85 regulatory subunit, or indirectly via IRS1. PI3K signaling plays a fundamental role in the regulation of myocardial contractility and hypertrophy[9]. |
| 16 | KIT             | Mast/stem cell growth factor receptor                      | 1t46         | A | Transmembrane receptor protein tyrosine kinase signaling pathway | This is the receptor for stem cell factor (mast cell growth factor). It has a tyrosine-protein kinase activity. Binding of ligands leads to the autophosphorylation of KIT and its association with substrates such as phosphatidylinositol 3-kinase (PI3K).                  |

|    |      |                                            |                              |   |                                                          |                                                                                                                                                                                                                                                                                                                                                                                                                                                                                                                     |
|----|------|--------------------------------------------|------------------------------|---|----------------------------------------------------------|---------------------------------------------------------------------------------------------------------------------------------------------------------------------------------------------------------------------------------------------------------------------------------------------------------------------------------------------------------------------------------------------------------------------------------------------------------------------------------------------------------------------|
| 17 | LCK  | Proto-oncogene tyrosine-protein kinase LCK | 1x27                         | A | Release of sequestered calcium ion into cytosol          | Tyrosine kinase that plays an essential role in the selection and maturation of developing T-cell in the thymus and mature T-cell function.                                                                                                                                                                                                                                                                                                                                                                         |
| 18 | MME  | Neprilysin                                 | 1r1i                         | A | Cell-cell signaling                                      | MME is implicated in the pathogenesis of arterial hypertension, congestive heart failure, left ventricular remodeling after myocardial infarction and other cardiovascular diseases. It is a novel target for the treatment of heart diseases[10].                                                                                                                                                                                                                                                                  |
| 19 | NOQ1 | NAD(P)H dehydrogenase [quinone] 1          | 1d4a<br>1dxo                 | A | Nitric oxide biosynthetic process<br>Oxidation reduction | NOQ1 is critically involved in the detoxification of xenobiotics as well as ROS and might function as an effective O <sub>2</sub> <sup>+</sup> scavenger in cardiac cells. Oxidative stress plays critical roles in the development of various forms of cardiovascular disorders, including myocardial ischemia-reperfusion injury, congestive heart failure, coronary arterial atherosclerosis, and chemical induced cardiotoxicity. Activation of NOQ1 increases resistance to oxidative cardiac cell injury[11]. |
| 20 | OAT  | Ornithine aminotransferase, mitochondrial  | 1gbn<br>1oat<br>2can<br>2oat | A | Ornithine-oxo-acid transaminase activity                 | Enzyme associated with amino-acid biosynthesis.                                                                                                                                                                                                                                                                                                                                                                                                                                                                     |
| 21 | RXRB | Retinoic acid receptor RXR-beta            | 1h9u                         | A | Regulation of transcription, DNA-dependent               | Nuclear hormone receptor. Involved in the retinoic acid response pathway.                                                                                                                                                                                                                                                                                                                                                                                                                                           |
| 22 | BST1 | ADP-ribosyl cyclase 2                      | 1isg                         | E | Humoral immune response                                  | ADPR-cyclase synthesizes cyclic ADP-ribose, a second messenger that elicits calcium release from intracellular stores. BST1 is an important mediator of cardiac hypertrophy, and inhibition of ADPR-cyclase attenuates angiotensin II-induced cardiac hypertrophy [12].                                                                                                                                                                                                                                             |

|    |                      |                                            |              |   |                                                                           |                                                                                                                                                                                                                                                                                                                                    |
|----|----------------------|--------------------------------------------|--------------|---|---------------------------------------------------------------------------|------------------------------------------------------------------------------------------------------------------------------------------------------------------------------------------------------------------------------------------------------------------------------------------------------------------------------------|
| 23 | DAPK1                | Death-associated protein kinase 1          | 1ig1<br>1jks | E | Induction of apoptosis by extracellular signals<br><br>Calmodulin binding | DAPK is a calmodulin-regulated serine/threonine protein kinase implicated in diverse apoptosis pathways, including those involved in neuronal cell death and tumour suppression. DAPK could be a potential therapeutic target for diseases characterized by rapid neurodegeneration, such as stroke or traumatic brain injury[13]. |
| 24 | GCK                  | Glucokinase                                | 1v4s         | E | Positive regulation of insulin secretion                                  | GCK intervenes in the regulation of glucose metabolism[14].                                                                                                                                                                                                                                                                        |
| 25 | <b>PIK3CG</b>        | Phosphoinositide 3-kinase gamma            | 1e8z<br>2a4z | E | G-protein coupled receptor protein signaling pathway                      | PIK3CG appears to negatively control cardiac contractility, thus becoming a possible drug target for the treatment of critical human cardiac pathologies, such as infarction or heart failure[15].                                                                                                                                 |
| 26 | <b>MAPK12 (ERK6)</b> | Mitogen-activated protein kinase p38 gamma | 1cm8         | E | MAP kinase activity<br><br>Ras protein signal transduction                | It is highly likely that p38 and JNK are both required to generate a hypertrophic or apoptotic response in overloaded hearts. It has been known that MAP kinases are sensitive to oxidative stress and antioxidants preferentially inhibit JNK and p38 [5].                                                                        |
| 27 | <b>MAPK14</b>        | Mitogen-activated protein kinase p38 alpha | 1wbv         | E | MAP kinase activity<br><br>Ras protein signal transduction                | See MAPK12 (Item 26).                                                                                                                                                                                                                                                                                                              |
| 28 | <b>MAPK8 (JNK1)</b>  | c-Jun N-terminal kinase 1                  | 2no3         | U | JUN kinase activity<br><br>JUN phosphorylation                            | See MAPK12 (Item 26).                                                                                                                                                                                                                                                                                                              |
| 29 | <b>ARF1</b>          | ADP-ribosylation factor 1                  | 1hur         | U | GTPase activity<br><br>Small GTPase mediated signal transduction          | Arfs are Ras-related small GTP-binding proteins[16] that are implicated in regulation of endothelial function, smooth muscle cell contraction, proliferation, and migration, as well as cardiomyocyte hypertrophy. Targeting small G proteins could constitute promising therapeutic approaches in cardiovascular disorders[17].   |
| 30 | DAPK2                | death-associated protein kinase 2          | 2a2a         | U | Induction of apoptosis by extracellular signals<br><br>Calmodulin binding | See DAPK1 (Item 23).                                                                                                                                                                                                                                                                                                               |

|    |                |                                                          |                      |   |                                                                               |                                                                                                                                                                                                                                                                                                                            |
|----|----------------|----------------------------------------------------------|----------------------|---|-------------------------------------------------------------------------------|----------------------------------------------------------------------------------------------------------------------------------------------------------------------------------------------------------------------------------------------------------------------------------------------------------------------------|
|    |                |                                                          |                      |   | Calmodulin-dependent protein kinase activity                                  |                                                                                                                                                                                                                                                                                                                            |
| 31 | <b>mTOR</b>    | Mammalian target of rapamycin                            | 1nsg<br>2fap<br>4fap | U | Phosphoinositide 3-kinase complex<br>Protein serine/threonine kinase activity | mTOR functions in the regulation of cardiac growth. Inhibition of mTOR attenuates the development of pressure overload cardiac hypertrophy and regresses established cardiac hypertrophy[18].                                                                                                                              |
| 32 | <b>HLA-A</b>   | HLA class I histocompatibility antigen, a-11 alpha chain | 1x7q                 | U | Immune response                                                               | See HLA-DRB1 (Item 14).                                                                                                                                                                                                                                                                                                    |
| 33 | <b>HLA-DRA</b> | HLA class II histocompatibility antigen, dr alpha chain  | 1bx2<br>1seb<br>2icw | U | Immune response                                                               | See HLA-DRB1 (Item 14).                                                                                                                                                                                                                                                                                                    |
| 34 | <b>IRAK4</b>   | Interleukin-1 receptor-associated kinase 4               | 2oib                 | U | I-kappaB kinase/NF-kappaB cascade                                             | IRAK-4 plays a central role in mediating NFκB activation and innate immunity signaling and thus could be potential target for inflammatory diseases[19].                                                                                                                                                                   |
| 35 | <b>MMP1</b>    | Interstitial collagenase                                 | 4ayk                 | U | Metalloendopeptidase activity<br>calcium ion binding                          | MMP activity contributes to left ventricular (LV) dilation and progression to LV dysfunction and direct MMP inhibition can attenuate this process [20].                                                                                                                                                                    |
| 36 | <b>MSN</b>     | Moesin                                                   | 1ef1                 | U | Leukocyte adhesion<br><br>Leukocyte migration                                 | Probably involved in connections of major cytoskeletal structures to the plasma membrane.                                                                                                                                                                                                                                  |
| 37 | <b>NCF1</b>    | Neutrophil NADPH oxidase factor 1                        | 1o7k                 | U | Innate immune response<br><br>superoxide release                              | NADPH oxidase has emerged as a major source of oxidative stress in the artery wall, particularly in artery disease. Nitric oxide and targeted inhibitors of NADPH oxidase are more likely to prevent the deterioration of vascular function that leads to stroke and heart attack, than are conventional antioxidants[21]. |

|    |             |                                                  |              |   |                                                                        |                                                                                                                                                                                                                                                                                                                                                           |
|----|-------------|--------------------------------------------------|--------------|---|------------------------------------------------------------------------|-----------------------------------------------------------------------------------------------------------------------------------------------------------------------------------------------------------------------------------------------------------------------------------------------------------------------------------------------------------|
| 38 | <b>RAC3</b> | RAS-related C3<br>botulinum toxin<br>substrate 3 | 2g0n<br>2ic5 | U | GTPase activity<br>Small GTPase mediated signal<br>transduction        | Rac3 is a member of the Rho family of small GTP-binding proteins. Small G proteins are implicated in regulation of endothelial function, smooth muscle cell contraction, proliferation and migration, as well as cardiomyocyte hypertrophy. Targeting small G proteins could constitute promising therapeutic approaches in cardiovascular disorders[17]. |
| 39 | <b>TGFA</b> | Protransforming<br>growth factor alpha           | 1mox         | U | Activation of MAPK activity<br>Positive regulation of EGFR<br>activity | TGFA is able to bind to the EGF receptor to regulate epidermal growth factor receptor (EGFR) activity. It is also able to activate MAPK activity. Inhibition of EGFR or MAPK has beneficial effects for cardiovascular diseases[4,5].                                                                                                                     |

## Reference

1. Maglott D, Ostell J, Pruitt KD, Tatusova T (2005) Entrez Gene: gene-centered information at NCBI. *Nucleic Acids Res*: D54 - 58.
2. Guengerich F (1999) Cytochrome P450 3A4: regulation and role in drug metabolism. *Annu Rev Pharmacol Toxicol* 39: 1-17.
3. Bloch KD, Janssens S (2005) Cardiomyocyte-Specific Overexpression of Nitric Oxide Synthase 3: Impact on Left Ventricular Function and Myocardial Infarction. *Trends in Cardiovascular Medicine* 15: 249-253.
4. Shah B, KJ C (2003) A central role of EGF receptor transactivation in angiotensin II -induced cardiac hypertrophy. *Trends in Pharmacological Sciences* 24: 239-244.
5. Pandya N, Santani D, Jain S (2005) Role of mitogen-activated protein (MAP) kinases in cardiovascular diseases. *Cardiovasc Drug Rev* 23: 247-254.
6. Sheng H, Zhu J, Wu X, Zhang J (2008) Blockade of calcineurin reverses cardiac hypertrophy and induces the down-regulation of JNK mRNA expression in renovascular hypertensive rats. *Journal of Renin-Angiotensin-Aldosterone System* 9: 139 - 145.
7. Kardami E, Jiang Z-S, Jimenez SK, Hirst CJ, Sheikh F, et al. (2004) Fibroblast growth factor 2 isoforms and cardiac hypertrophy. *Cardiovasc Res* 63: 458-466.
8. Diamantopoulos EJ, Andreadis EA, Vassilopoulos CV, Vlachonikolis IG, Tarassi KE, et al. (2003) HLA phenotypes as promoters of cardiovascular remodelling in subjects with arterial hypertension. *J Hum Hypertens* 17: 63-68.
9. Oudit GY, Sun H, Kerfant B-G, Crackower MA, Penninger JM, et al. (2004) The role of phosphoinositide-3 kinase and PTEN in cardiovascular physiology and disease. *Journal of Molecular and Cellular Cardiology* 37: 449-471.
10. De Vos J, Thykjaer T, Tarte K, Ensslen M, Raynaud P, et al. (2002) Comparison of gene expression profiling between malignant and normal plasma cells with oligonucleotide arrays. *Oncogene* 21: 6848-6857.
11. Cao Z, Zhu H, Zhang L, Zhao X, Zweier JL, et al. (2006) Antioxidants and Phase 2 Enzymes in Cardiomyocytes: Chemical Inducibility and Chemoprotection Against Oxidant and Simulated Ischemia-Reperfusion Injury. *Experimental Biology and Medicine* 231: 1353-1364.
12. Gul R, Park J-H, Kim S-Y, Jang KY, Chae J-K, et al. (2009) Inhibition of ADP-ribosyl cyclase attenuates angiotensin II-induced cardiac hypertrophy. *Cardiovasc Res* 81: 582-591.
13. Schumacher A, Velentza A, Watterson D (2002) Death-associated protein kinase as a potential therapeutic target. *Expert Opin Ther Targets* 6: 497-506.
14. Mordier S, Iynedjian PB (2007) Activation of mammalian target of rapamycin complex 1 and insulin resistance induced by palmitate in hepatocytes. *Biochemical and Biophysical Research Communications* 362: 206-211.
15. Alloatti G, Montrucchio G, Lembo G, Hirsch E (2004 ) Phosphoinositide 3-kinase gamma: kinase-dependent and -independent activities in cardiovascular function and disease. *Biochem Soc Trans* 32: 383-386.
16. Alfarano C, Andrade CE, Anthony K, Bahroos N, Bajec M, et al. (2005) The Biomolecular Interaction Network Database and related tools 2005 update. *Nucleic Acids Res* 33: D418-424.
17. Barandier C, Ming XF, Yang ZH ( 2003) Small G proteins as novel therapeutic targets in

cardiovascular medicine. *News Physiol Sci* 18: 18-22.

18. McMullen J, Sherwood M, Tarnavski O, Zhang L, Dorfman A, et al. (2004) Inhibition of mTOR signaling with rapamycin regresses established cardiac hypertrophy induced by pressure overload. *Circulation* 109: 3050-3055.
19. Ringwood L, Li L (2008) The involvement of the interleukin-1 receptor-associated kinases (IRAKs) in cellular signaling networks controlling inflammation. *Cytokine* 42: 1-7.
20. Peterson JT, Hallak H, Johnson L, Li H, O'Brien PM, et al. (2001) Matrix Metalloproteinase Inhibition Attenuates Left Ventricular Remodeling and Dysfunction in a Rat Model of Progressive Heart Failure. *Circulation* 103: 2303-2309.
21. Dusting GJ, Selemidis S, Jiang F (2005) Mechanisms for suppressing NADPH oxidase in the vascular wall. *Mem Inst Oswaldo Cruz, Rio de Janeiro* 100(Suppl. I): 97-103.
